# Supplementary material for: Reduced activity of SKCa and Na-K ATPase underlies the accelerated impairment of EDH-type relaxations in mesenteric arteries of aging spontaneously hypertensive rats
Source: PubMed Central journal article supplement — Pharmacol Res Perspect. 2015 May 20;3(3):e00150. doi: 10.1002/prp2.150 (PMC4492766; doi:10.1002/prp2.150), 2015-05-20
Supplement: prp20003-e00150-sd1.pdf [file prp20003-e00150-sd1.pdf]

# Supplementary Figure

## WKY

## SHR

- Indomethacin
- ▲ Indo + L-NAME
- ▼ Indo + TRAM-34 + UCL1684
- ◆ Indo + L-NAME + TRAM-34 + UCL1684

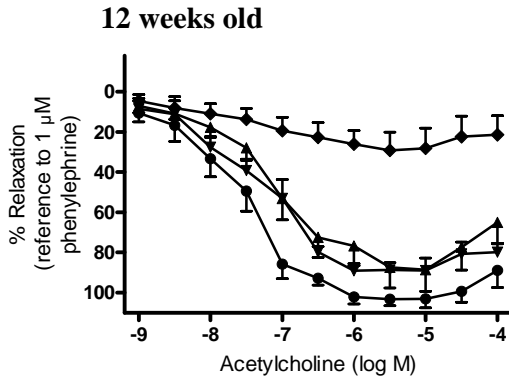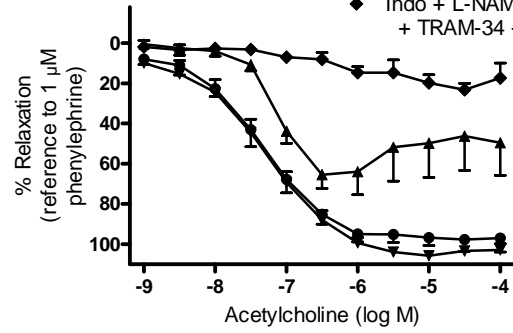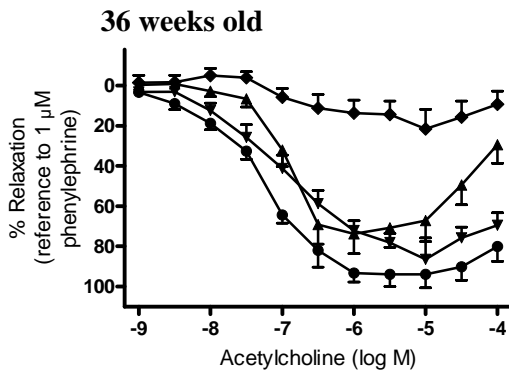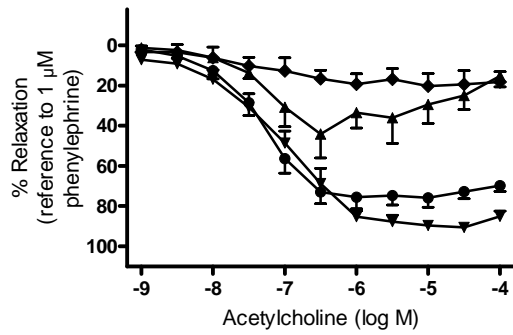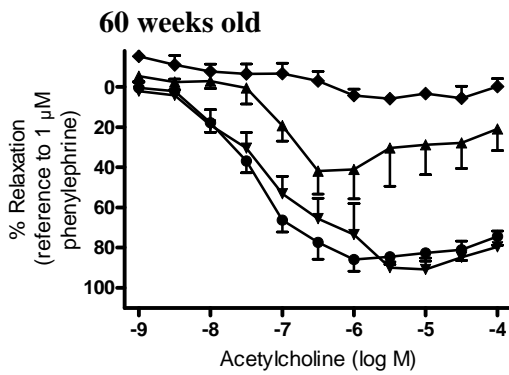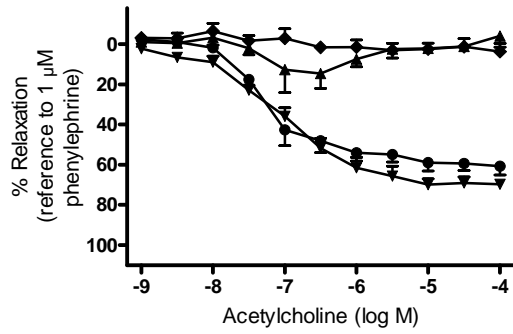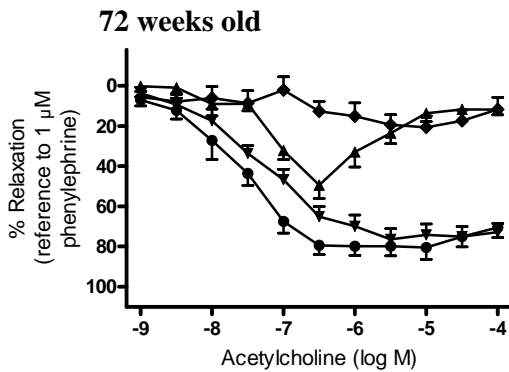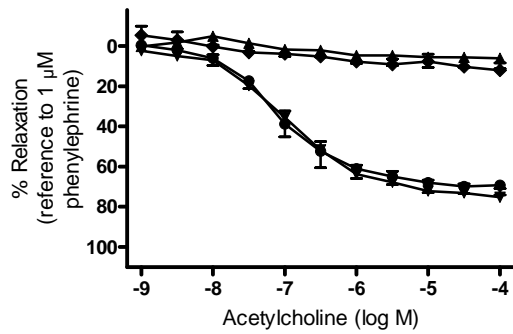

**Supplementary Figure Legend:**

Acetylcholine-induced relaxations of superior mesenteric arteries of (*Left*) Wistar Kyoto (WKY) and (*Right*) spontaneously hypertensive rats (SHR) at various ages in the presence of indomethacin (cyclooxygenase inhibitor;  $10^{-5}$  M) with and without L-NAME (nitric oxide synthase inhibitor;  $10^{-4}$  M), TRAM-34 (inhibitor of intermediate-conductance calcium-activated potassium channel;  $5 \times 10^{-7}$  M) plus UCL 1684 (inhibitor of small-conductance calcium-activated potassium channel;  $5 \times 10^{-7}$  M), and their combination. Values are means  $\pm$  SEM of five to eight experiments.
